# Supplementary material
Source: PubMed Central journal article supplement (PMC8608113)
Supplement: nursrep-11-00012-s001.pdf [file nursrep-11-00012-s001.pdf]

**Table S1.** Summary of the univariate logistic regression analyses.

**Model 1: Univariate logistic regression predicting the likelihood of reporting yes (1) to the perceived importance of self-care action to discuss the use of health screening tests with your provider (action item #5)**

|                          | B      | S.E.  | Wald  | df | p      | Odds Ratio | 95% C.I. for Odds Ratio/Lower | 95% C.I. for Odds Ratio/Upper |
|--------------------------|--------|-------|-------|----|--------|------------|-------------------------------|-------------------------------|
| Ref= (65 to <75 years)   |        |       | 4.611 | 2  | 0.100  |            |                               |                               |
| Age (75 to < 85years)    | -1.495 | 1.173 | 1.625 | 1  | 0.202  | 0.224      | 0.022                         | 2.234                         |
| Age (85 years and above) | -2.520 | 1.192 | 4.466 | 1  | 0.035* | 0.080      | 0.008                         | 0.833                         |

\*:  $p < 0.05$ .

**Model 2: Univariate logistic regression predicting the likelihood of reporting yes (1) to desire to perform self-care action to discuss the use of health screening tests with your provider (action item #5)**

|                                                            | B     | S.E.  | Wald  | df | p      | Odds Ratio | 95% C.I. for Odds Ratio/Lower | 95% C.I. for Odds Ratio/Upper |
|------------------------------------------------------------|-------|-------|-------|----|--------|------------|-------------------------------|-------------------------------|
| Ref= (Less than high school)                               |       |       | 4.572 | 2  | 0.102  |            |                               |                               |
| Education (High school diploma)                            | 1.299 | 1.165 | 1.243 | 1  | 0.265  | 3.667      | 0.374                         | 35.979                        |
| Education (Associate degree, bachelor's degree, and above) | 1.522 | 0.731 | 4.334 | 1  | 0.037* | 4.583      | 1.093                         | 19.217                        |

\*:  $p < 0.05$ .

**Model 3: Univariate logistic regression predicting the likelihood of reporting yes (1) to the ability to perform self-care action to discuss the use of health screening tests with your provider (action item #5)**

|                                                            | B     | S.E.  | Wald  | df | p      | Odds Ratio | 95% C.I. for Odds Ratio/Lower | 95% C.I. for Odds Ratio/Upper |
|------------------------------------------------------------|-------|-------|-------|----|--------|------------|-------------------------------|-------------------------------|
| Ref= (Less than high school)                               |       |       | 4.986 | 2  | 0.083  |            |                               |                               |
| Education (High school diploma)                            | 2.655 | 1.275 | 4.333 | 1  | 0.037* | 14.222     | 1.168                         | 173.229                       |
| Education (Associate degree, bachelor's degree, and above) | 0.288 | 1.000 | 0.083 | 1  | 0.774  | 1.333      | 0.188                         | 9.465                         |

\*:  $p < 0.05$ .

**Model 4: Univariate logistic regression predicting the likelihood of reporting yes (1) to the ability to perform self-care action to join in local health screening or wellness events (action item #9)**

|                            | B      | S.E.  | Wald  | df | p      | Odds Ratio | 95% C.I. for Odds Ratio/Lower | 95% C.I. for Odds Ratio/Upper |
|----------------------------|--------|-------|-------|----|--------|------------|-------------------------------|-------------------------------|
| Ref= (Married)             |        |       | 4.831 | 2  | 0.089  |            |                               |                               |
| Marital status (Single)    | -0.176 | 0.799 | 0.049 | 1  | 0.825  | 0.838      | 0.175                         | 4.016                         |
| Marital status (Separated) | -1.917 | 0.947 | 4.101 | 1  | 0.043* | 0.147      | 0.023                         | 0.940                         |

\*:  $p < 0.05$ .

**Table S2.** Summary of multiple logistic regression models with at least one statistically significant regression coefficient value. Five models showed the statistical significance summarized below.

**Model #1: Predicting the likelihood of reporting yes (1) to perceived desire to perform self-care action #1 (Create habits that will improve health and prevent disease)**

|                                                            | B      | S.E.     | Wald  | df | Sig.   | Odds Ratio  | 95% C.I.<br>for Odds<br>Ra-<br>tio/Lower | 95% C.I.<br>for Odds<br>Ratio/Up-<br>per |
|------------------------------------------------------------|--------|----------|-------|----|--------|-------------|------------------------------------------|------------------------------------------|
| Residence (1 = urban) Ref = Rural                          | -1.220 | 1.059    | 1.328 | 1  | 0.249  | 0.295       | 0.037                                    | 2.351                                    |
| Gender (1 = male) Ref = Female                             | 19.951 | 9669.476 | 0.000 | 1  | 0.998  | 461889617.2 | 0.000                                    | .                                        |
| Ref= (65 to <75 years)                                     |        |          | 1.283 | 2  | 0.527  |             |                                          |                                          |
| Age (75 to < 85 years)                                     | 0.551  | 1.248    | 0.195 | 1  | 0.659  | 1.734       | 0.150                                    | 20.033                                   |
| Age (85 years and above)                                   | 1.947  | 1.724    | 1.274 | 1  | 0.259  | 7.006       | 0.239                                    | 205.741                                  |
| Ref= (Married)                                             |        |          | 3.332 | 2  | 0.189  |             |                                          |                                          |
| Marital status (Single)                                    | -2.891 | 1.618    | 3.191 | 1  | 0.074  | 0.056       | 0.002                                    | 1.324                                    |
| Marital status (Separated)                                 | -2.555 | 1.737    | 2.165 | 1  | 0.141  | 0.078       | 0.003                                    | 2.337                                    |
| Ref= (Less than high school)                               |        |          | 5.563 | 2  | 0.062  |             |                                          |                                          |
| Education (High school diploma)                            | 3.653  | 1.661    | 4.838 | 1  | 0.028* | 38.572      | 1.489                                    | 999.356                                  |
| Education (Associate degree, bachelor's degree, and above) | 1.458  | 1.684    | 0.749 | 1  | 0.387  | 4.297       | 0.158                                    | 116.655                                  |

\*:  $p < 0.05$ .

**Model #2: Predicting the likelihood of reporting yes (1) to being able to perform self-care action #5 (Discuss use of health screening tests with your provider)**

|                                                            | B      | S.E.     | Wald  | df | Sig.   | Odds Ratio | 95% C.I.<br>for Odds<br>Ra-<br>tio/Lower | 95% C.I.<br>for Odds<br>Ratio/Up-<br>per |
|------------------------------------------------------------|--------|----------|-------|----|--------|------------|------------------------------------------|------------------------------------------|
| Residence (1 = urban) Ref = Rural                          | -0.888 | 1.415    | 0.394 | 1  | 0.530  | 0.412      | 0.026                                    | 6.585                                    |
| Gender (1 = male) Ref = Female                             | -1.950 | 1.475    | 1.747 | 1  | 0.186  | 0.142      | 0.008                                    | 2.565                                    |
| Ref= (65 to <75 years)                                     |        |          | 2.708 | 2  | 0.258  |            |                                          |                                          |
| Age (75 to < 85 years)                                     | -3.393 | 2.062    | 2.708 | 1  | 0.100  | 0.034      | 0.001                                    | 1.913                                    |
| Age (85 years and above)                                   | 18.081 | 9854.817 | 0.000 | 1  | 0.999  | 71184464.6 | 0.000                                    | .                                        |
| Ref= (Married)                                             |        |          | 0.385 | 2  | 0.825  |            |                                          |                                          |
| Marital status (Single)                                    | -0.939 | 1.515    | 0.384 | 1  | 0.535  | 0.391      | 0.020                                    | 7.623                                    |
| Marital status (Separated)                                 | -0.387 | 2.042    | 0.036 | 1  | 0.850  | 0.679      | 0.012                                    | 37.131                                   |
| Ref= (Less than high school)                               |        |          | 5.681 | 2  | 0.058  |            |                                          |                                          |
| Education (High school diploma)                            | 4.685  | 1.998    | 5.496 | 1  | 0.019* | 108.296    | 2.156                                    | 5440.577                                 |
| Education (Associate degree, bachelor's degree, and above) | 1.089  | 1.983    | 0.302 | 1  | 0.583  | 2.972      | 0.061                                    | 144.840                                  |

\*:  $p < 0.05$ .

**Model #3: Predicting the likelihood of reporting yes (1) to the perceived importance of self-care action #9 (Join in local health screening or wellness events)**

|  | B | S.E. | Wald | df | Sig. | Odds Ratio |
|--|---|------|------|----|------|------------|
|--|---|------|------|----|------|------------|

|                                                            |        |       |       |   |        |       | 95% C.I.<br>for Odds<br>Ra-<br>tio/Lower | 95% C.I.<br>for Odds<br>Ratio/Up-<br>per |
|------------------------------------------------------------|--------|-------|-------|---|--------|-------|------------------------------------------|------------------------------------------|
| Residence (1 = urban) Ref = Rural                          | -0.719 | 0.581 | 1.533 | 1 | 0.216  | 0.487 | 0.156                                    | 1.521                                    |
| Gender (1 = male) Ref = Female                             | 1.189  | 0.865 | 1.887 | 1 | 0.170  | 3.283 | 0.602                                    | 17.897                                   |
| Ref= (65 to <75 years)                                     |        |       | 0.428 | 2 | 0.807  |       |                                          |                                          |
| Age (75 to < 85years)                                      | -0.095 | 0.668 | 0.020 | 1 | 0.887  | 0.910 | 0.246                                    | 3.369                                    |
| Age (85 years and above)                                   | -0.501 | 0.778 | 0.414 | 1 | 0.520  | 0.606 | 0.132                                    | 2.783                                    |
| Ref= (Married)                                             |        |       | 0.849 | 2 | 0.654  |       |                                          |                                          |
| Marital status (Single)                                    | -.528  | 0.609 | 0.751 | 1 | 0.386  | 0.590 | 0.179                                    | 1.946                                    |
| Marital status (Separated)                                 | -0.555 | 0.899 | 0.382 | 1 | 0.537  | 0.574 | 0.099                                    | 3.342                                    |
| Ref= (Less than high school)                               |        |       | 4.573 | 2 | 0.102  |       |                                          |                                          |
| Education (High school diploma)                            | 1.517  | 0.768 | 3.897 | 1 | 0.048* | 4.559 | 1.011                                    | 20.558                                   |
| Education (Associate degree, bachelor's degree, and above) | 0.656  | 0.945 | 0.481 | 1 | 0.488  | 1.926 | 0.302                                    | 12.282                                   |

\*:  $p < 0.05$ .

**Model #4: Predicting the likelihood of reporting yes (1) to perceived desire to perform self-care action #9 (Join in local health screening or wellness events)**

|                                                            | B      | S.E.  | Wald  | df | Sig.   | Odds Ratio | 95% C.I.<br>for Odds<br>Ra-<br>tio/Lower | 95% C.I.<br>for Odds<br>Ratio/Up-<br>per |
|------------------------------------------------------------|--------|-------|-------|----|--------|------------|------------------------------------------|------------------------------------------|
| Residence (1 = urban) Ref = Rural                          | -1.186 | 0.635 | 3.493 | 1  | 0.062  | 0.305      | 0.088                                    | 1.059                                    |
| Gender (1 = male) Ref = Female                             | 0.002  | 0.860 | 0.000 | 1  | 0.998  | 1.002      | 0.186                                    | 5.410                                    |
| Ref= (65 to <75 years)                                     |        |       | 0.077 | 2  | 0.962  |            |                                          |                                          |
| Age (75 to < 85years)                                      | -0.200 | 0.726 | 0.076 | 1  | 0.783  | 0.819      | 0.197                                    | 3.397                                    |
| Age (85 years and above)                                   | -0.075 | 0.853 | 0.008 | 1  | 0.930  | 0.927      | 0.174                                    | 4.938                                    |
| Ref= (Married)                                             |        |       | 2.216 | 2  | 0.330  |            |                                          |                                          |
| Marital status (Single)                                    | -0.874 | 0.639 | 1.870 | 1  | 0.171  | 0.417      | 0.119                                    | 1.460                                    |
| Marital status (Separated)                                 | -1.188 | 1.050 | 1.280 | 1  | 0.258  | 0.305      | 0.039                                    | 2.388                                    |
| Ref= (Less than high school)                               |        |       | 4.336 | 2  | 0.114  |            |                                          |                                          |
| Education (High school diploma)                            | 1.700  | 0.818 | 4.318 | 1  | 0.038* | 5.475      | 1.101                                    | 27.218                                   |
| Education (Associate degree, bachelor's degree, and above) | 1.424  | 1.081 | 1.735 | 1  | 0.188  | 4.154      | .499                                     | 34.586                                   |

\*:  $p < 0.05$ .

**Model #5: Predicting the likelihood of reporting yes (1) to being able to perform self-care action #9 (Join in local health screening or wellness events)**

|                                   | B      | S.E.  | Wald  | df | Sig.  | Odds Ratio | 95% C.I.<br>for Odds<br>Ra-<br>tio/Lower | 95% C.I.<br>for Odds<br>Ratio/Up-<br>per |
|-----------------------------------|--------|-------|-------|----|-------|------------|------------------------------------------|------------------------------------------|
| Residence (1 = urban) Ref = Rural | -1.918 | 1.286 | 2.223 | 1  | 0.136 | 0.147      | 0.012                                    | 1.828                                    |

|                                                            |         |          |       |   |         |        |       |         |
|------------------------------------------------------------|---------|----------|-------|---|---------|--------|-------|---------|
| Gender (1 = male) Ref = Female                             | -1.254  | 1.497    | 0.702 | 1 | 0.402   | 0.285  | 0.015 | 5.362   |
| Ref= (65 to <75 years)                                     |         |          | 0.487 | 2 | 0.784   |        |       |         |
| Age (75 to < 85years)                                      | -19.857 | 5377.370 | 0.000 | 1 | 0.997   | 0.000  | 0.000 | .       |
| Age (85 years and above)                                   | -20.632 | 5377.370 | 0.000 | 1 | 0.997   | 0.000  | 0.000 | .       |
| Ref= (Married)                                             |         |          | 4.699 | 2 | 0.095   |        |       |         |
| Marital status (Single)                                    | -0.014  | 1.124    | 0.000 | 1 | 0.990   | 0.986  | 0.109 | 8.923   |
| Marital status (Separated)                                 | -3.608  | 1.730    | 4.350 | 1 | 0.037 * | 0.027  | 0.001 | 0.805   |
| Ref= (Less than high school)                               |         |          | 3.247 | 2 | 0.197   |        |       |         |
| Education (High school diploma)                            | 2.429   | 1.391    | 3.048 | 1 | 0.081   | 11.350 | 0.742 | 173.518 |
| Education (Associate degree, bachelor's degree, and above) | 2.831   | 1.970    | 2.067 | 1 | 0.151   | 16.969 | 0.357 | 805.727 |

\*:  $p < 0.05$ .
